# Supplementary material for: A Meta-Analysis of SMAD4 Immunohistochemistry as a Prognostic Marker in Colorectal Cancer
Source: PubMed Central journal article supplement — Transl Oncol. 2015 Mar 3;8(1):18–24. doi: 10.1016/j.tranon.2014.11.003 (PMC4350636; doi:10.1016/j.tranon.2014.11.003), 2015-03-03
Supplement: mmc1.pdf [file mmc1.pdf]

| study group                                   | Isaksson 2006 | Bacman 2007 | Li 2011 | Isaksson 2012 | Lampropoulos 2012 | Roth 2012 | Voorneveld 2013 | Alazzouzi 2005 | Alhopuro 2005 | Baraniskin 2011 | Mesker 2009 | Gulubova 2010 | Ahn 2009 |
|-----------------------------------------------|---------------|-------------|---------|---------------|-------------------|-----------|-----------------|----------------|---------------|-----------------|-------------|---------------|----------|
| <b>study group</b>                            |               |             |         |               |                   |           |                 |                |               |                 |             |               |          |
| population described                          |               |             |         |               |                   |           |                 |                |               |                 |             |               |          |
| Gender/age                                    | 1             | 1           | 1       | 1             | 1                 | 1         | 1               | 1              | 1             | 1               | 1           | 1             | 1        |
| Histology                                     | 1             | 1           | 1       | 1             | 1                 | 1         | 1               | 1              | 1             | 1               | 1           | 1             | 1        |
| period of recruitment                         | 1             | 1           | 1       | 1             | 1                 | 1         | 0               | 1              | 1             | 1               | 0           | 1             | 1        |
| Inclusion/exclusion                           | 1             | 1           | 0       | 1             | 1                 | 1         | 0               | 1              | 1             | 1               | 1           | 1             | 1        |
| <b>Study attrition</b>                        |               |             |         |               |                   |           |                 |                |               |                 |             |               |          |
| >90% of identified included in final analysis | 0             | 1           | 1       | 1             | 1                 | 1         | 1               | 1              | 1             | 1               | 0           | 1             | 0        |
| Reasons for loss to follow up given           | 1             | 1           | 0       | 1             | 1                 | 1         | 1               | 1              | 1             | 1               | 1           | 1             | 0        |
| Peri-operative mortality details              | 1             | 1           | 0       | 0             | 1                 | 1         | 0               | 0              | 0             | 0               | 1           | 1             | 0        |
| <b>Scientific methodology</b>                 |               |             |         |               |                   |           |                 |                |               |                 |             |               |          |
| IHC methodology outlined                      |               |             |         |               |                   |           |                 |                |               |                 |             |               |          |
| Details of 1ste/2nd Abs used                  | 1             | 1           | 1       | 1             | 1                 | 1         | 1               | 1              | 1             | 1               | 1           | 1             | 1        |
| Concentration                                 | 1             | 1           | 1       | 1             | 1                 | 1         | 1               | 1              | 1             | 1               | 1           | 1             | 1        |
| Positive negative control                     | 1             | 1           | 0       | 1             | 1                 | 1         | 0               | 1              | 0             | 0               | 0           | 1             | 1        |
| Description scoring system                    |               |             |         |               |                   |           |                 |                |               |                 |             |               |          |
| >1 independent scorer                         | 1             | 0           | 1       | 1             | 1                 | 1         | 1               | 1              | 1             | 1               | 1           | 0             | 1        |
| Blind                                         | 0             | 0           | 1       | 1             | 1                 | 1         | 1               | 1              | 1             | 1               | 1           | 0             | 0        |
| Criteria for positive outlined                |               |             |         |               |                   |           |                 |                |               |                 |             |               |          |
| Distribution (membr vs nuclear)               | 0             | 0           | 1       | 1             | 1                 | 0         | 0               | 1              | 0             | 0               | 1           | 1             | 0        |
| % pos for classification stated               | 1             | 0           | 0       | 1             | 1                 | 1         | 0               | 1              | 0             | 0               | 1           | 1             | 1        |
| <b>Confounding factors considered</b>         |               |             |         |               |                   |           |                 |                |               |                 |             |               |          |
| Adjuvant therapy details provided             | 1             | 1           | 0       | 0             | 1                 | 1         | 1               | 1              | 1             | 1               | 1           | 1             | 1        |
| Histology breakdown according to IHC staining | 1             | 1           | 1       | 1             | 1                 | 1         | 1               | 1              | 1             | 1               | 0           | 0             | 0        |
| <b>Statistical analysis</b>                   |               |             |         |               |                   |           |                 |                |               |                 |             |               |          |
| HR (CI) provided                              | 1             | 1           | 1       | 1             | 1                 | 1         | 1               | 1              | 0             | 0               | 0           | 0             | 0        |
| Exact p-value                                 | 1             | 1           | 1       | 1             | 1                 | 1         | 1               | 1              | 1             | 1               | 1           | 1             | 1        |
| number at risk for Kaplan Meier               | 1             | 1           | 1       | 1             | 1                 | 0         | 1               | 1              | 1             | 1               | 1           | 1             | 1        |
| Number of censored cases                      | 1             | 0           | 0       | 0             | 0                 | 0         | 1               | 1              | 1             | 1               | 0           | 0             | 0        |
| <b>total</b>                                  | 17            | 15          | 13      | 17            | 17                | 17        | 14              | 19             | 15            | 15              | 14          | 15            | 13       |
